# Supplementary material for: Adhesion of Rhodococcus bacteria to solid hydrocarbons and enhanced biodegradation of these compounds
Source: PubMed Central journal article supplement (PMC9748138; doi:10.1038/s41598-022-26173-3), 2022-12-13
Supplement: 41598_2022_26173_MOESM1_ESM.pdf [file 41598_2022_26173_MOESM1_ESM.pdf]

Table S1 – *Rhodococcus* strains (<http://www.iegmcol.ru>)

| Strain                 | Isolation source                                                                  | Public accession                                                                                                                                            |
|------------------------|-----------------------------------------------------------------------------------|-------------------------------------------------------------------------------------------------------------------------------------------------------------|
| <i>R. erythropolis</i> |                                                                                   |                                                                                                                                                             |
| IEGM 20                | Oil-polluted soil, Ukraine                                                        | <a href="http://www.iegmcol.ru/strains/rhodoc/eryth/r_eryth20.html">http://www.iegmcol.ru/strains/rhodoc/eryth/r_eryth20.html</a>                           |
| IEGM 185               | Water, Kama reservoir, Perm krai, Russia                                          | <a href="http://www.iegmcol.ru/strains/rhodoc/eryth/r_eryth185.html">http://www.iegmcol.ru/strains/rhodoc/eryth/r_eryth185.html</a>                         |
| IEGM 186               | Water, Kama reservoir, Perm krai, Russia                                          | <a href="http://www.iegmcol.ru/strains/rhodoc/eryth/r_eryth186.html">http://www.iegmcol.ru/strains/rhodoc/eryth/r_eryth186.html</a>                         |
| IEGM 188               | Oil-polluted bottom sediments, the Ostjatski Zhivets river, Tyumen region, Russia | <a href="http://www.iegmcol.ru/strains/rhodoc/eryth/r_eryth188.html">http://www.iegmcol.ru/strains/rhodoc/eryth/r_eryth188.html</a>                         |
| IEGM 192               | Oil-polluted bottom sediments, Bezjimyannoe lake, Tyumen region, Russia           | <a href="http://www.iegmcol.ru/strains/rhodoc/eryth/r_eryth192.html">http://www.iegmcol.ru/strains/rhodoc/eryth/r_eryth192.html</a>                         |
| IEGM 212               | Sewage, Kharbin, China                                                            | <a href="http://www.iegmcol.ru/strains/rhodoc/eryth/r_eryth212.html">http://www.iegmcol.ru/strains/rhodoc/eryth/r_eryth212.html</a>                         |
| IEGM 265               | Oil-polluted soil, oil-extracting enterprise, Perm krai, Russia                   | <a href="http://www.iegmcol.ru/strains/rhodoc/eryth/r_eryth265.html">http://www.iegmcol.ru/strains/rhodoc/eryth/r_eryth265.html</a>                         |
| IEGM 266               | Oil-polluted soil, oil-extracting enterprise, Perm krai, Russia                   | <a href="http://www.iegmcol.ru/strains/rhodoc/eryth/r_eryth266.html">http://www.iegmcol.ru/strains/rhodoc/eryth/r_eryth266.html</a>                         |
| IEGM 268               | Oil-polluted soil, oil-extracting enterprise, Perm krai, Russia                   | <a href="http://www.iegmcol.ru/strains/rhodoc/eryth/r_eryth268.html">http://www.iegmcol.ru/strains/rhodoc/eryth/r_eryth268.html</a>                         |
| IEGM 269               | Oil-polluted soil, oil-extracting enterprise, Perm krai, Russia                   | <a href="http://www.iegmcol.ru/strains/rhodoc/eryth/r_eryth269.html">http://www.iegmcol.ru/strains/rhodoc/eryth/r_eryth269.html</a>                         |
| IEGM 271               | Oil-polluted soil, oil-extracting enterprise, Perm krai, Russia                   | <a href="http://www.iegmcol.ru/strains/rhodoc/eryth/r_eryth271.html">http://www.iegmcol.ru/strains/rhodoc/eryth/r_eryth271.html</a>                         |
| IEGM 487               | Water, the Baykal Lake, Irkutsk region, Russia                                    | <a href="http://www.iegmcol.ru/strains/rhodoc/eryth/r_eryth487.html">http://www.iegmcol.ru/strains/rhodoc/eryth/r_eryth487.html</a> ,<br>GenBank#KF547999   |
| IEGM 708               | Oil-shale from settling pit, Polazna oil-extracting enterprise, Perm krai, Russia | <a href="http://www.iegmcol.ru/strains/rhodoc/eryth/r_eryth708.html">http://www.iegmcol.ru/strains/rhodoc/eryth/r_eryth708.html</a> ,<br>GenBank#KY194798   |
| IEGM 1189              | Water, Tyumen region, Russia                                                      | <a href="http://www.iegmcol.ru/strains/rhodoc/eryth/r_eryth1189.html">http://www.iegmcol.ru/strains/rhodoc/eryth/r_eryth1189.html</a> ,<br>GenBank#MG645202 |
| <i>R. fascians</i>     |                                                                                   |                                                                                                                                                             |
| IEGM 34                | Carp skin                                                                         | <a href="http://www.iegmcol.ru/strains/rhodoc/fascians/r_fasc34.html">http://www.iegmcol.ru/strains/rhodoc/fascians/r_fasc34.html</a>                       |
| IEGM 39                | Stratal water, oilfield, Perm krai, Russia                                        | <a href="http://www.iegmcol.ru/strains/rhodoc/fascians/r_fasc39.html">http://www.iegmcol.ru/strains/rhodoc/fascians/r_fasc39.html</a>                       |
| IEGM 170               | Snow carpet, Polasna oil-extracting enterprise, Perm krai,                        | <a href="http://www.iegmcol.ru/strains/rhodoc/fascians/r_fasc170.html">http://www.iegmcol.ru/strains/rhodoc/fascians/r_fasc170.html</a>                     |

|                       |                                                                   |                                                                                                                                                                                                          |
|-----------------------|-------------------------------------------------------------------|----------------------------------------------------------------------------------------------------------------------------------------------------------------------------------------------------------|
| IEGM 278              | Russia<br>River water, Tyumen region, Russia                      | <a href="http://www.iegmcoll.ru/strains/rhodoc/fascians/r_fasc278.html">http://www.iegmcoll.ru/strains/rhodoc/fascians/r_fasc278.html</a>                                                                |
| <i>R. jostii</i>      |                                                                   |                                                                                                                                                                                                          |
| IEGM 28               | Soil, the bank of the pond, Dnepropetrovsk region, Ukraine        | <a href="http://www.iegmcoll.ru/strains/rhodoc/jostii/r_jostii28.html">http://www.iegmcoll.ru/strains/rhodoc/jostii/r_jostii28.html</a> ,<br>GenBank#MG912559                                            |
| IEGM 29               | Oil-polluted soil, oil-gas field, Poltava region, Ukraine         | <a href="http://www.iegmcoll.ru/strains/rhodoc/jostii/r_jostii29.html">http://www.iegmcoll.ru/strains/rhodoc/jostii/r_jostii29.html</a> ,<br>GenBank#MG912570                                            |
| IEGM 31               | Oil-polluted soil, oil-gas field, Poltava region, Ukraine         | <a href="http://www.iegmcoll.ru/strains/rhodoc/jostii/r_jostii31.html">http://www.iegmcoll.ru/strains/rhodoc/jostii/r_jostii31.html</a> ,<br>GenBank#MG912563                                            |
| IEGM 32               | Soil, field, Poltava region, Ukraine                              | <a href="http://www.iegmcoll.ru/strains/rhodoc/jostii/r_jostii32.html">http://www.iegmcoll.ru/strains/rhodoc/jostii/r_jostii32.html</a> ,<br>GenBank#MG912560                                            |
| IEGM 33               | Oil-polluted soil, oil-gas field, Ivano-Frankovsk region, Ukraine | <a href="http://www.iegmcoll.ru/strains/rhodoc/jostii/r_jostii33.html">http://www.iegmcoll.ru/strains/rhodoc/jostii/r_jostii33.html</a>                                                                  |
| IEGM 60               | Oil-polluted soil, oilfield, Ukraine                              | <a href="http://www.iegmcoll.ru/strains/rhodoc/jostii/r_jostii60.html">http://www.iegmcoll.ru/strains/rhodoc/jostii/r_jostii60.html</a> ,<br>GenBank#MG607376                                            |
| IEGM 68               | Soil, Polasna oil-extracting enterprise, Perm krai, Russia        | <a href="http://www.iegmcoll.ru/strains/rhodoc/jostii/r_jostii68.html">http://www.iegmcoll.ru/strains/rhodoc/jostii/r_jostii68.html</a> ,<br>GenBank#MG912561                                            |
| <i>R. opacus</i>      |                                                                   |                                                                                                                                                                                                          |
| IEGM 56               | Soil, windbreak, Kherson region, Ukraine                          | <a href="http://www.iegmcoll.ru/strains/rhodoc/opac/r_opac56.html">http://www.iegmcoll.ru/strains/rhodoc/opac/r_opac56.html</a>                                                                          |
| IEGM 57               | Oil-polluted soil, Ukraine                                        | <a href="http://www.iegmcoll.ru/strains/rhodoc/opac/r_opac57.html">http://www.iegmcoll.ru/strains/rhodoc/opac/r_opac57.html</a>                                                                          |
| IEGM 59               | No information                                                    | <a href="http://www.iegmcoll.ru/strains/rhodoc/opac/r_opac59.html">http://www.iegmcoll.ru/strains/rhodoc/opac/r_opac59.html</a>                                                                          |
| IEGM 246              | Soil, lavsan (polyether fibre) production, Belarus                | <a href="http://www.iegmcoll.ru/strains/rhodoc/opac/r_opac246.html">http://www.iegmcoll.ru/strains/rhodoc/opac/r_opac246.html</a> ,<br>GenBank#MG607380                                                  |
| IEGM 261              | Soil, lavsan (polyether fibre) production, Belarus                | <a href="http://www.iegmcoll.ru/strains/rhodoc/opac/r_opac261.html">http://www.iegmcoll.ru/strains/rhodoc/opac/r_opac261.html</a>                                                                        |
| IEGM 262              | Soil, lavsan (polyether fibre) production, Belarus                | <a href="http://www.iegmcoll.ru/strains/rhodoc/opac/r_opac262.html">http://www.iegmcoll.ru/strains/rhodoc/opac/r_opac262.html</a>                                                                        |
| IEGM 716 <sup>T</sup> | Municipal gasworks defective pipe, UK                             | <a href="http://www.iegmcoll.ru/strains/rhodoc/opac/r_opac716t.html">http://www.iegmcoll.ru/strains/rhodoc/opac/r_opac716t.html</a>                                                                      |
| IEGM 717              | Soil                                                              | <a href="http://www.iegmcoll.ru/strains/rhodoc/opac/r_opac717.html">http://www.iegmcoll.ru/strains/rhodoc/opac/r_opac717.html</a>                                                                        |
| IEGM 1157             | Soil, Perm, Perm krai, Russia                                     | <a href="http://www.iegmcoll.ru/strains/rhodoc/opac/r_opac1157.html">http://www.iegmcoll.ru/strains/rhodoc/opac/r_opac1157.html</a>                                                                      |
| <i>R. qingshengii</i> |                                                                   |                                                                                                                                                                                                          |
| IEGM 267              | Oil-polluted soil oil-extracting enterprise, Perm krai, Russia    | <a href="http://www.iegmcoll.ru/strains/rhodoc/qingsh/r_qingsh267.html">http://www.iegmcoll.ru/strains/rhodoc/qingsh/r_qingsh267.html</a> ,<br>DDBJ/ENA/GenBank acc. no <u>MRBQ01000001-MRBQ01000231</u> |

|                       |                                                                           |                                                                                                                                                                                                                                                                                             |
|-----------------------|---------------------------------------------------------------------------|---------------------------------------------------------------------------------------------------------------------------------------------------------------------------------------------------------------------------------------------------------------------------------------------|
| <i>R. rhodochrous</i> |                                                                           |                                                                                                                                                                                                                                                                                             |
| IEGM 63               | Oil-polluted soil, Ukraine                                                | <a href="http://www.iegmcoll.ru/strains/rhodoc/rhodoch/r_rhod63.html">http://www.iegmcoll.ru/strains/rhodoc/rhodoch/r_rhod63.html</a>                                                                                                                                                       |
| IEGM 64               | No information                                                            | <a href="http://www.iegmcoll.ru/strains/rhodoc/rhodoch/r_rhod64.html">http://www.iegmcoll.ru/strains/rhodoc/rhodoch/r_rhod64.html</a>                                                                                                                                                       |
| IEGM 66               | No information                                                            | <a href="http://www.iegmcoll.ru/strains/rhodoc/rhodoch/r_rhod66.html">http://www.iegmcoll.ru/strains/rhodoc/rhodoch/r_rhod66.html</a> ,<br>DDBJ/ENA/GenBank acc. no <a href="https://www.ncbi.nlm.nih.gov/nuccore/JAJNDE010000001-JAJNDE010000099">JAJNDE010000001-<br/>JAJNDE010000099</a> |
| IEGM 67               | Soil, UK                                                                  | <a href="http://www.iegmcoll.ru/strains/rhodoc/rhodoch/r_rhod67.html">http://www.iegmcoll.ru/strains/rhodoc/rhodoch/r_rhod67.html</a>                                                                                                                                                       |
| IEGM 608              | Water, Berezniki, Perm krai, Russia                                       | <a href="http://www.iegmcoll.ru/strains/rhodoc/rhodoch/r_rhod608.html">http://www.iegmcoll.ru/strains/rhodoc/rhodoch/r_rhod608.html</a> ,<br>GenBank#KY194859                                                                                                                               |
| IEGM 632              | Water, Berezniki, Perm krai, Russia                                       | <a href="http://www.iegmcoll.ru/strains/rhodoc/rhodoch/r_rhod632.html">http://www.iegmcoll.ru/strains/rhodoc/rhodoch/r_rhod632.html</a>                                                                                                                                                     |
| IEGM 639              | Snow, oilfield, Perm krai, Russia                                         | <a href="http://www.iegmcoll.ru/strains/rhodoc/rhodoch/r_rhod639.html">http://www.iegmcoll.ru/strains/rhodoc/rhodoch/r_rhod639.html</a>                                                                                                                                                     |
| IEGM 646              | Water, Berezniki, Perm krai, Russia                                       | <a href="http://www.iegmcoll.ru/strains/rhodoc/rhodoch/r_rhod646.html">http://www.iegmcoll.ru/strains/rhodoc/rhodoch/r_rhod646.html</a>                                                                                                                                                     |
| IEGM 647              | Oil-polluted water, Mezhevskoe oilfield, Perm krai, Russia                | <a href="http://www.iegmcoll.ru/strains/rhodoc/rhodoch/r_rhod647.html">http://www.iegmcoll.ru/strains/rhodoc/rhodoch/r_rhod647.html</a> ,<br>GenBank#MG607375                                                                                                                               |
| IEGM 1137             | Oil-polluted soil, Solikamsk, Perm krai, Russia                           | <a href="http://www.iegmcoll.ru/strains/rhodoc/rhodoch/r_rhod1137.html">http://www.iegmcoll.ru/strains/rhodoc/rhodoch/r_rhod1137.html</a>                                                                                                                                                   |
| IEGM 1138             | Oil-polluted soil, Solikamsk, Perm krai, Russia                           | <a href="http://www.iegmcoll.ru/strains/rhodoc/rhodoch/r_rhod1138.html">http://www.iegmcoll.ru/strains/rhodoc/rhodoch/r_rhod1138.html</a>                                                                                                                                                   |
| <i>R. ruber</i>       |                                                                           |                                                                                                                                                                                                                                                                                             |
| IEGM 65               | Water, Mississippi river, USA                                             | <a href="http://www.iegmcoll.ru/strains/rhodoc/ruber/r_ruber65.html">http://www.iegmcoll.ru/strains/rhodoc/ruber/r_ruber65.html</a>                                                                                                                                                         |
| IEGM 73               | Ground water, Masuninskoe oilfield outline zone, Perm krai, Russia        | <a href="http://www.iegmcoll.ru/strains/rhodoc/ruber/r_ruber73.html">http://www.iegmcoll.ru/strains/rhodoc/ruber/r_ruber73.html</a>                                                                                                                                                         |
| IEGM 76               | Snow, oilfield outline zone, Perm krai, Russia                            | <a href="http://www.iegmcoll.ru/strains/rhodoc/ruber/r_ruber76.html">http://www.iegmcoll.ru/strains/rhodoc/ruber/r_ruber76.html</a>                                                                                                                                                         |
| IEGM 77               | Water, spring, oilfield outline zone, Perm krai, Russia                   | <a href="http://www.iegmcoll.ru/strains/rhodoc/ruber/r_ruber77.html">http://www.iegmcoll.ru/strains/rhodoc/ruber/r_ruber77.html</a>                                                                                                                                                         |
| IEGM 84               | Sandy soil, Gomel region, Belarus                                         | <a href="http://www.iegmcoll.ru/strains/rhodoc/ruber/r_ruber84.html">http://www.iegmcoll.ru/strains/rhodoc/ruber/r_ruber84.html</a>                                                                                                                                                         |
| IEGM 90               | Surface water reservoir, the Taimir peninsula, Krasnoyarsk region, Russia | <a href="http://www.iegmcoll.ru/strains/rhodoc/ruber/r_ruber90.html">http://www.iegmcoll.ru/strains/rhodoc/ruber/r_ruber90.html</a>                                                                                                                                                         |
| IEGM 93               | Sandy soil, Irkutsk region, Russia                                        | <a href="http://www.iegmcoll.ru/strains/rhodoc/ruber/r_ruber93.html">http://www.iegmcoll.ru/strains/rhodoc/ruber/r_ruber93.html</a>                                                                                                                                                         |
| IEGM 172              | Stratal water, oilfield, Perm krai, Russia                                | <a href="http://www.iegmcoll.ru/strains/rhodoc/ruber/r_ruber172.html">http://www.iegmcoll.ru/strains/rhodoc/ruber/r_ruber172.html</a>                                                                                                                                                       |
| IEGM 219              | Water, the Upper Ilitch river, Russia                                     | <a href="http://www.iegmcoll.ru/strains/rhodoc/ruber/r_ruber219.html">http://www.iegmcoll.ru/strains/rhodoc/ruber/r_ruber219.html</a>                                                                                                                                                       |

| <i>R. ruber</i> |                                                                       |                                                                                                                                                                                                      |
|-----------------|-----------------------------------------------------------------------|------------------------------------------------------------------------------------------------------------------------------------------------------------------------------------------------------|
| IEGM 223        | Soil, Polasna oil-extracting enterprise, Perm krai, Russia            | <a href="http://www.iegmcoll.ru/strains/rhodoc/ruber/r_ruber223.html">http://www.iegmcoll.ru/strains/rhodoc/ruber/r_ruber223.html</a>                                                                |
| IEGM 224        | Soil, Polasna oil-extracting enterprise, Perm krai, Russia            | <a href="http://www.iegmcoll.ru/strains/rhodoc/ruber/r_ruber224.html">http://www.iegmcoll.ru/strains/rhodoc/ruber/r_ruber224.html</a>                                                                |
| IEGM 225        | Soil, Polasna oil-extracting enterprise, Perm krai, Russia            | <a href="http://www.iegmcoll.ru/strains/rhodoc/ruber/r_ruber225.html">http://www.iegmcoll.ru/strains/rhodoc/ruber/r_ruber225.html</a> ,<br>GenBank#KJ442849                                          |
| IEGM 231        | Water, spring, Olkhovski oil-extracting enterprise, Perm krai, Russia | <a href="http://www.iegmcoll.ru/strains/rhodoc/ruber/r_ruber231.html">http://www.iegmcoll.ru/strains/rhodoc/ruber/r_ruber231.html</a> ,<br>DDBJ/ENA/GenBank acc. no <u>CCSD01000001-CCSD01000115</u> |
| IEGM 233        | Soil, Polasna oil-extracting enterprise, Perm krai, Russia            | <a href="http://www.iegmcoll.ru/strains/rhodoc/ruber/r_ruber233.html">http://www.iegmcoll.ru/strains/rhodoc/ruber/r_ruber233.html</a> ,<br>GenBank#KJ442850                                          |
| IEGM 235        | Snow, Polasna oil-extracting enterprise, Perm krai, Russia            | <a href="http://www.iegmcoll.ru/strains/rhodoc/ruber/r_ruber235.html">http://www.iegmcoll.ru/strains/rhodoc/ruber/r_ruber235.html</a> ,<br>GenBank#KJ442851                                          |
| IEGM 236        | Soil, Polasna oil-extracting enterprise, Perm krai, Russia            | <a href="http://www.iegmcoll.ru/strains/rhodoc/ruber/r_ruber236.html">http://www.iegmcoll.ru/strains/rhodoc/ruber/r_ruber236.html</a>                                                                |
| IEGM 238        | Sandy soil, Gomel region, Belarus                                     | <a href="http://www.iegmcoll.ru/strains/rhodoc/ruber/r_ruber238.html">http://www.iegmcoll.ru/strains/rhodoc/ruber/r_ruber238.html</a>                                                                |
| IEGM 241        | Chalk rock (depth 80 m), Gomel region, Belarus                        | <a href="http://www.iegmcoll.ru/strains/rhodoc/ruber/r_ruber241.html">http://www.iegmcoll.ru/strains/rhodoc/ruber/r_ruber241.html</a>                                                                |
| IEGM 323        | Turf soil, Oktyabrski district, Sverdlovsk region, Russia             | <a href="http://www.iegmcoll.ru/strains/rhodoc/ruber/r_ruber323.html">http://www.iegmcoll.ru/strains/rhodoc/ruber/r_ruber323.html</a>                                                                |
| IEGM 325        | Oil-polluted water, Bistrinskoe oilfield, Tyumen region, Russia       | <a href="http://www.iegmcoll.ru/strains/rhodoc/ruber/r_ruber325.html">http://www.iegmcoll.ru/strains/rhodoc/ruber/r_ruber325.html</a>                                                                |
| IEGM 326        | Turf soil, oil-gas field, Perm krai, Russia                           | <a href="http://www.iegmcoll.ru/strains/rhodoc/ruber/r_ruber326.html">http://www.iegmcoll.ru/strains/rhodoc/ruber/r_ruber326.html</a> ,<br>GenBank#MG637021                                          |
| IEGM 327        | Turf soil, oil-gas field, Perm krai, Russia                           | <a href="http://www.iegmcoll.ru/strains/rhodoc/ruber/r_ruber327.html">http://www.iegmcoll.ru/strains/rhodoc/ruber/r_ruber327.html</a> ,<br>GenBank#KJ442854                                          |
| IEGM 328        | Water, well, oil-gas field, Perm krai, Russia                         | <a href="http://www.iegmcoll.ru/strains/rhodoc/ruber/r_ruber328.html">http://www.iegmcoll.ru/strains/rhodoc/ruber/r_ruber328.html</a>                                                                |
| IEGM 334        | Sand rock from the depth 6 m, Belarus                                 | <a href="http://www.iegmcoll.ru/strains/rhodoc/ruber/r_ruber334.html">http://www.iegmcoll.ru/strains/rhodoc/ruber/r_ruber334.html</a>                                                                |
| IEGM 342        | Underground water, oilfield, Perm krai, Russia                        | <a href="http://www.iegmcoll.ru/strains/rhodoc/ruber/r_ruber342.html">http://www.iegmcoll.ru/strains/rhodoc/ruber/r_ruber342.html</a> ,<br>GenBank#KY174957                                          |
| IEGM 381        | Water, the Baykal Lake, Irkutsk region, Russia                        | <a href="http://www.iegmcoll.ru/strains/rhodoc/ruber/r_ruber381.html">http://www.iegmcoll.ru/strains/rhodoc/ruber/r_ruber381.html</a>                                                                |
| IEGM 385        | Bottomset beds, the Baykal Lake, Irkutsk region, Russia               | <a href="http://www.iegmcoll.ru/strains/rhodoc/ruber/r_ruber385.html">http://www.iegmcoll.ru/strains/rhodoc/ruber/r_ruber385.html</a>                                                                |

---

|                        |                                                                  |                                                                                                                                     |
|------------------------|------------------------------------------------------------------|-------------------------------------------------------------------------------------------------------------------------------------|
| <i>R. ruber</i>        |                                                                  |                                                                                                                                     |
| IEGM 436               | Soil, bank of the Pechjora river, Russia                         | <a href="http://www.iegmccl.ru/strains/rhodoc/ruber/r_ruber436.html">http://www.iegmccl.ru/strains/rhodoc/ruber/r_ruber436.html</a> |
| IEGM 438               | Oil-polluted water, oil-extracting enterprise, Perm krai, Russia | <a href="http://www.iegmccl.ru/strains/rhodoc/ruber/r_ruber438.html">http://www.iegmccl.ru/strains/rhodoc/ruber/r_ruber438.html</a> |
| IEGM 440               | Oil-polluted sand, Belarus                                       | <a href="http://www.iegmccl.ru/strains/rhodoc/ruber/r_ruber440.html">http://www.iegmccl.ru/strains/rhodoc/ruber/r_ruber440.html</a> |
| IEGM 443               | No information                                                   | <a href="http://www.iegmccl.ru/strains/rhodoc/ruber/r_ruber443.html">http://www.iegmccl.ru/strains/rhodoc/ruber/r_ruber443.html</a> |
| <i>Rhodococcus</i> sp. |                                                                  |                                                                                                                                     |
| IEGM 27                | Oil-polluted soil, oil-gas field, Poltava region, Ukraine        | <a href="http://www.iegmccl.ru/strains/rhodoc/sp/r_sp27.html">http://www.iegmccl.ru/strains/rhodoc/sp/r_sp27.html</a>               |
| IEGM 61                | Oil-polluted soil, Ukraine                                       | <a href="http://www.iegmccl.ru/strains/rhodoc/sp/r_sp61.html">http://www.iegmccl.ru/strains/rhodoc/sp/r_sp61.html</a>               |
| IEGM 69                | Soil, Polasna oil-extracting enterprise, Perm krai, Russia       | <a href="http://www.iegmccl.ru/strains/rhodoc/sp/r_sp69.html">http://www.iegmccl.ru/strains/rhodoc/sp/r_sp69.html</a>               |
| IEGM 1276              | Oil slime, Udmurt Republic, Russia                               | <a href="http://www.iegmccl.ru/strains/rhodoc/sp/r_sp1276.html">http://www.iegmccl.ru/strains/rhodoc/sp/r_sp1276.html</a>           |

---

For some strains, the species level has status “failed” that is related with current changes in taxonomy and defining of borders for closely related species.

Table S2 – *Rhodococcus* strains selected for adhesion and biodegradation experiments

| Strain                          | Isolation source                                                  | Properties                                                                                                                                                                                                                                         |
|---------------------------------|-------------------------------------------------------------------|----------------------------------------------------------------------------------------------------------------------------------------------------------------------------------------------------------------------------------------------------|
| <i>R. erythropolis</i> IEGM 212 | Sewage, Kharbin, China                                            | Uses hydrocarbons as a sole carbon source; resistant to Pb <sup>2+</sup> (20.0 mm), Cr <sup>6+</sup> (10.0 mm), Cu <sup>2+</sup> (5.0 mm)                                                                                                          |
| <i>R. erythropolis</i> IEGM 266 | Oil-polluted soil, oil-extracting enterprise, Perm region, Russia | Uses hydrocarbons and crude oil as a sole carbon source (95); resistant to Cr <sup>6+</sup> (20.0 mm), VO <sup>2+</sup> (12.5 mm), VO <sub>4</sub> <sup>3-</sup> (50.0 mm), VO <sub>3</sub> <sup>-</sup> (>250.0 mm)                               |
| <i>R. opacus</i> IEGM 57        | Oil-polluted soil, Ukraine                                        | Uses <i>n</i> -hexadecane and crude oil as a sole carbon source; resistant to Cr <sup>6+</sup> (5.0 mm), VO <sub>4</sub> <sup>3-</sup> (25.0 mm), VO <sub>3</sub> <sup>-</sup> (>250.0 mm)                                                         |
| <i>R. opacus</i> IEGM 262       | Soil, lavsan (polyether fibre) production, Belarus                | Uses <i>n</i> -hexadecane, <i>n</i> -docosane, <i>n</i> -hexacosane, <i>n</i> -octacosane, <i>n</i> -nonacosane, <i>n</i> -hentriacontane, anthracene, and phenanthrene as a sole carbon and energy source; resistant to Pb <sup>2+</sup> (5.0 mm) |
| <i>R. opacus</i> IEGM 717       | Soil, UK                                                          | Uses <i>n</i> -hexadecane as a sole carbon source; resistant to VO <sub>4</sub> <sup>3-</sup> (12.5 mm), VO <sub>3</sub> <sup>-</sup> (>250.0 mm); accumulates nickel                                                                              |
| <i>R. qingshengii</i> IEGM 267  | Oil-polluted soil, oil-extracting enterprise, Perm region, Russia | Uses hydrocarbons and crude oil as a sole carbon source; resistant to Cr <sup>6+</sup> (5.0 mm), VO <sup>2+</sup> (12.5 mm), VO <sub>4</sub> <sup>3-</sup> (50.0 mm), VO <sub>3</sub> <sup>-</sup> (250.0 mm)                                      |
| <i>R. rhodochrous</i> IEGM 63   | Oil-polluted soil, Ukraine                                        | Uses hydrocarbons as a sole carbon source; accumulates cesium ions; resistant to Cr <sup>6+</sup> (5.0 mm), VO <sup>2+</sup> (12.5 mm), VO <sub>4</sub> <sup>3-</sup> (50.0 mm), VO <sub>3</sub> <sup>-</sup> (>250.0 mm)                          |
| <i>R. rhodochrous</i> IEGM 64   | Oil-polluted soil, Ukraine                                        | Uses hydrocarbons as a sole carbon source; resistant to Cr <sup>6+</sup> (5.0 mm), VO <sup>2+</sup> (12.5 mm), VO <sub>4</sub> <sup>3-</sup> (50.0 mm), VO <sub>3</sub> <sup>-</sup> (>250.0 mm), accumulates molybdenum and nickel                |
| <i>R. rhodochrous</i> IEGM 646  | Water, Berezniki, Perm region, Russia                             | Uses hydrocarbons as a sole carbon source; resistant to Cr <sup>6+</sup> (5.0 mm), VO <sup>2+</sup> (12.5 mm), VO <sub>4</sub> <sup>3-</sup> (100.0 mm), VO <sub>3</sub> <sup>-</sup> (>250.0 mm),                                                 |

|                          |                                                 |                                                                                                                                                                                                                                                           |
|--------------------------|-------------------------------------------------|-----------------------------------------------------------------------------------------------------------------------------------------------------------------------------------------------------------------------------------------------------------|
|                          |                                                 | accumulates molybdenum and nickel                                                                                                                                                                                                                         |
| <i>R. ruber</i> IEGM 219 | Water, the Upper Ilitch river, Russia           | Uses propane, <i>n</i> -butane (95) and liquid <i>n</i> -alkanes (C <sub>5</sub> -C <sub>7</sub> , C <sub>11</sub> -C <sub>16</sub> ); resistant to Pb <sup>2+</sup> (5.0 mm)                                                                             |
| <i>R. ruber</i> IEGM 241 | Chalk rock (depth 80 m), Gomel region, Belarus  | Uses propane, <i>n</i> -butane and liquid <i>n</i> -alkanes (C <sub>5</sub> -C <sub>16</sub> ) as a sole carbon source; accumulates cesium ions; resistant to Cr <sup>6+</sup> (10.0 mm), Cu <sup>2+</sup> , Ni <sup>2+</sup> , Pb <sup>2+</sup> (5.0 mm) |
| <i>R. ruber</i> IEGM 328 | Water, well, oil-gas field, Perm region, Russia | Uses propane and <i>n</i> -butane as a sole carbon source; resistant to Pb <sup>2+</sup> (5.0 mm)                                                                                                                                                         |

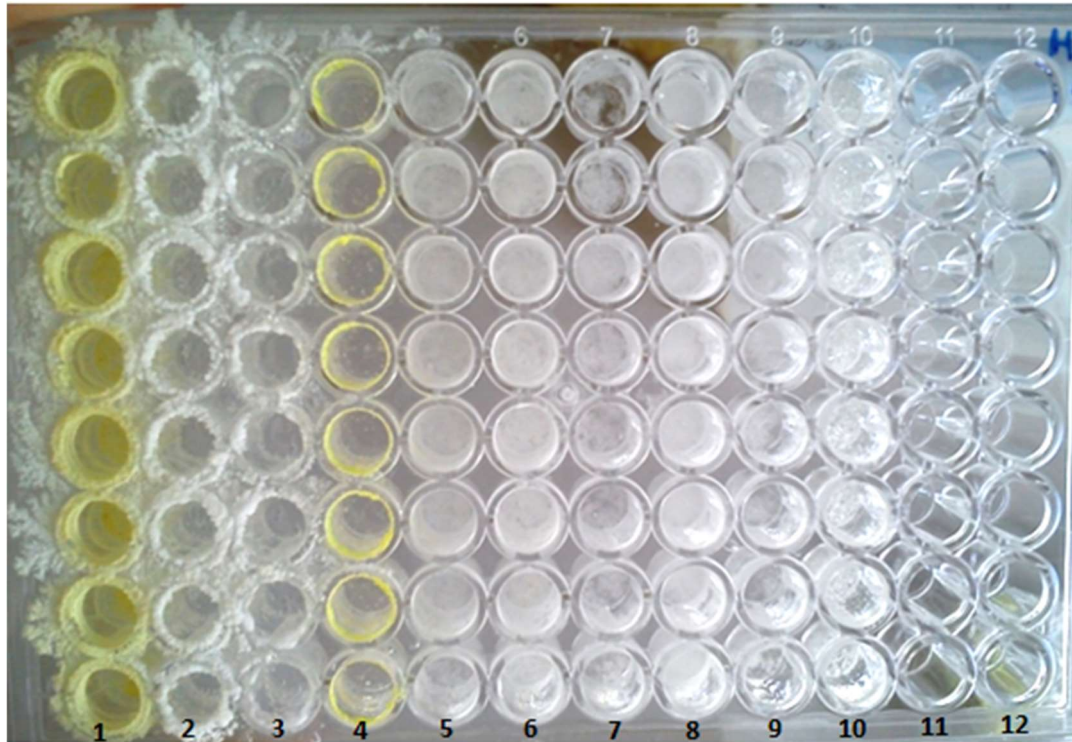

Figure S1 – **The 96-well polystyrene microplate modified using hydrocarbons**

Hydrocarbons: 1 – benzo[a]pyrene, 2 – phenanthrene, 3 – naphthalene, 4 – benzo[a]anthracene, 5 – *n*-octacosane, 6 – *n*-docosane, 7 – *n*-nonacosane, 8 – *n*-hexacosane, 9 – *n*-hentriacontane, 10 – anthracene, 11, 12 – control (without hydrocarbons).



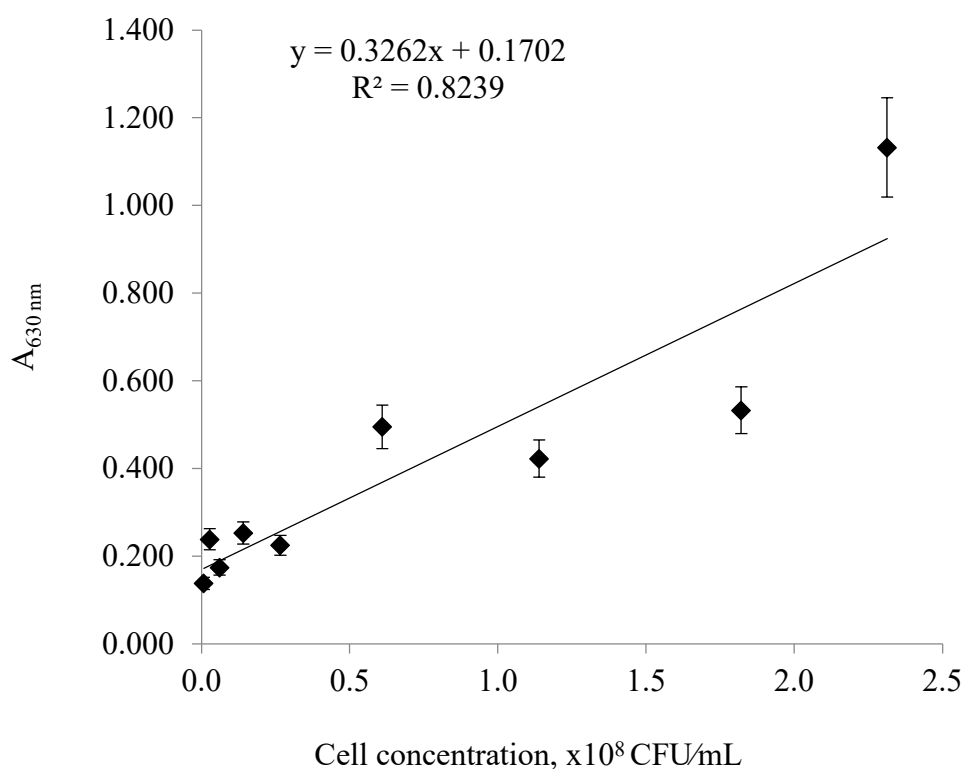

**Figure S2 – Calibration curve between concentration of *Rhodococcus* cells and A<sub>630 nm</sub> after staining of cells with crystal violet**

Protocol for calibration: Cells were grown in 250-mL Erlenmeyer flasks with 100 mL LB at 160 rpm and 28 °C for 28–30 h (until the late exponential growth phase), washed twice with 0.5% NaCl, resuspended in 0.5% NaCl and diluted in the range of concentrations between 0 and  $2.5 \times 10^8$  CFU/mL in increments  $0.5 \cdot 10^8$  and  $0.1 \cdot 10^8$  CFU/mL. For each suspension, a precise number of cells (CFU/mL) on nutrient agar was determined. Suspensions (1 mL) were then centrifuged; supernatant was removed; 1 mL of 1% (w/w) crystal violet was added; cells were resuspended in the dye solution with thorough mixing to obtain a homogenous suspension and left at room temperature for 20 min for staining. Stained cells were centrifuged; supernatant was removed; cells were washed twice with 1 mL 0.5% NaCl (each time cells were centrifuged and resuspended to a homogenous suspension); and the crystal violet was extracted from cells with 1 mL of acetone/ethanol mixture (1:4, v/v) at 160 rpm and room temperature for 5 min. The extract was transferred into polystyrene microplates (200  $\mu$ L per well), and absorbance at 630 nm was measured with a Multiscan Ascent photometer (Thermo Electron Corporation, Finland). Three replicates of suspensions were used for each cell concentration. A calibration curve was built using the obtained values of A<sub>630 nm</sub> and CFU/mL.

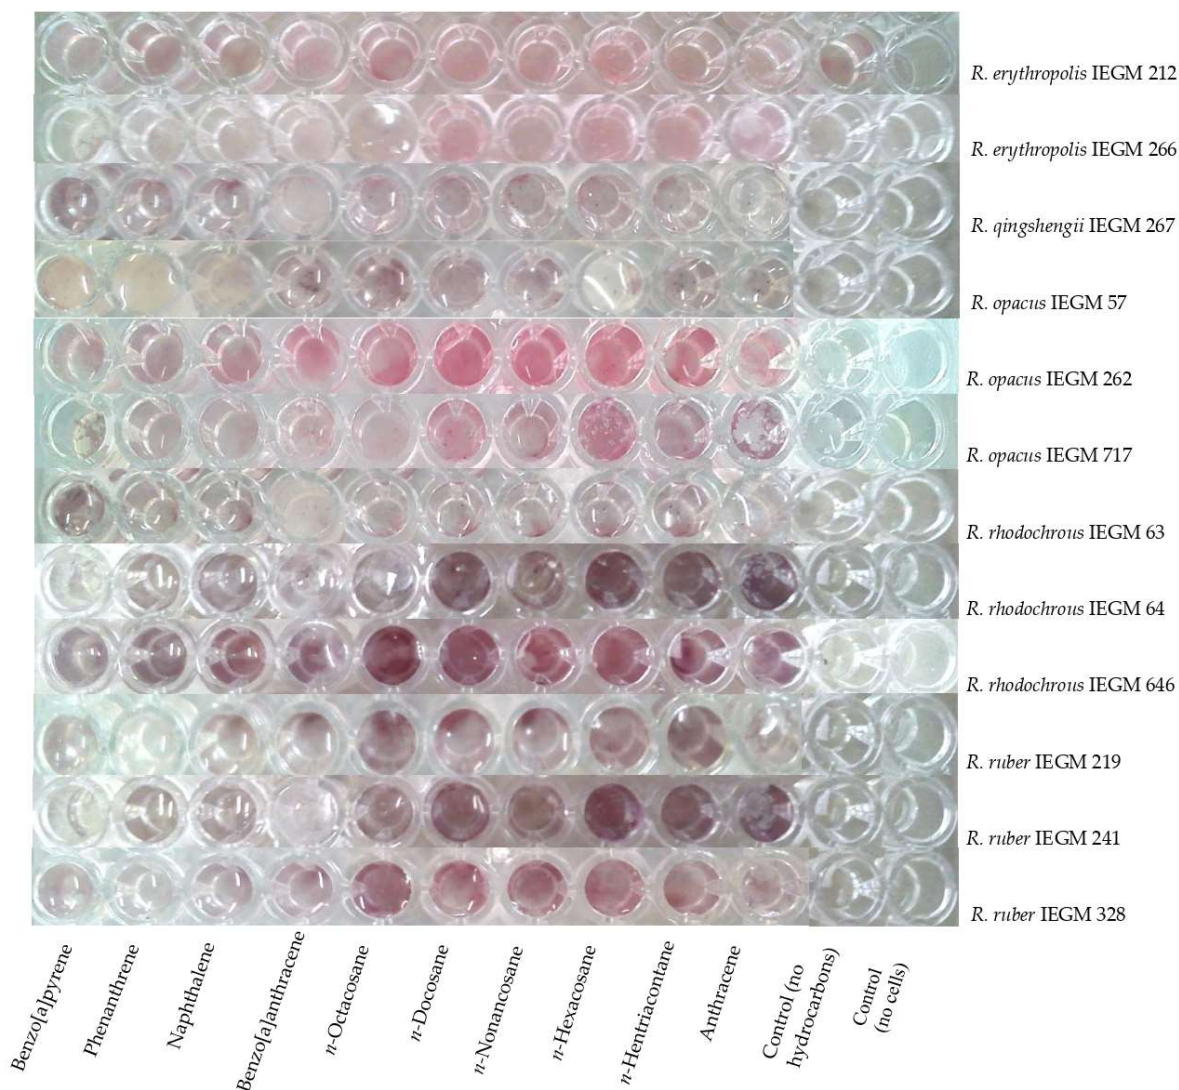

Figure S3 – Growth of *Rhodococcus* cells in the presence of 0.2 mM individual C22–C31 *n*-alkanes or PAHs detected with INT staining after incubation for 72 h

Control (no growth) – medium with cells and without hydrocarbons. Control (no cells) – medium with hydrocarbons and without cells.

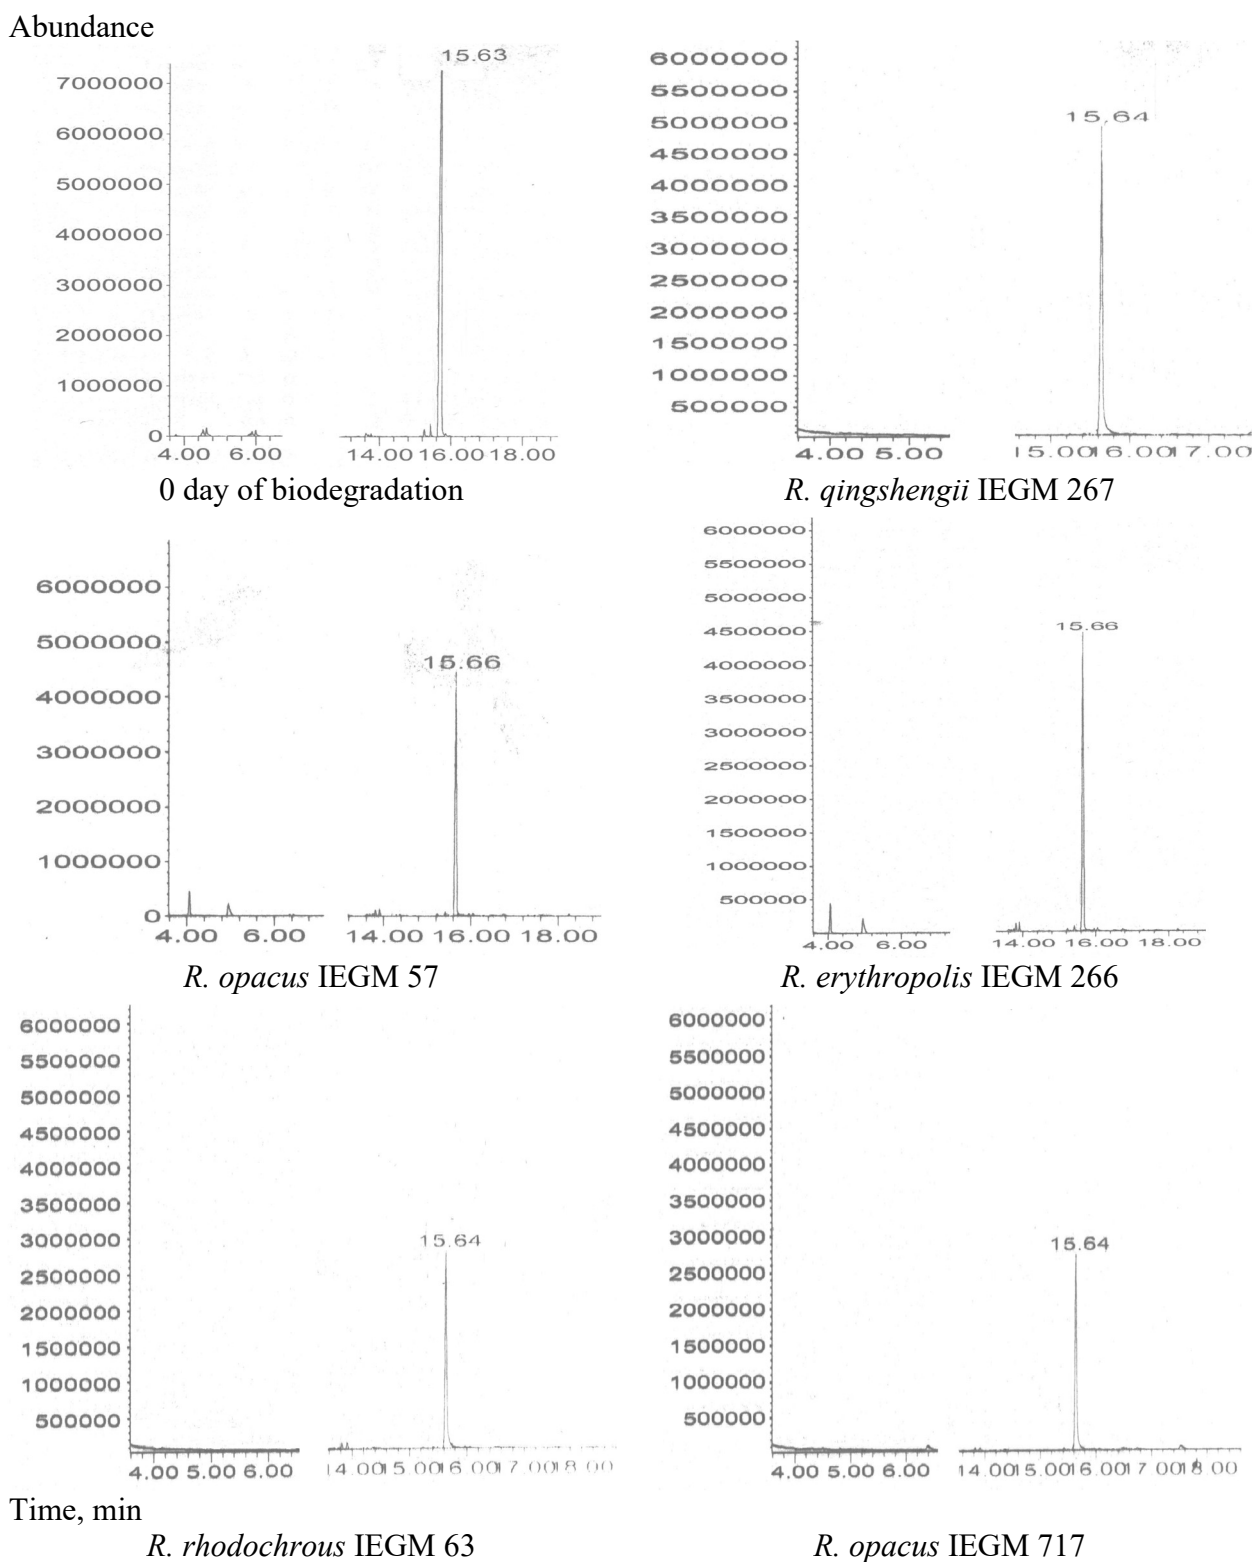

Figure S4 – GC-MS chromatograms of residual anthracene (retention time 15.63–15.66 min) after 9 days of biodegradation by *Rhodococcus* cells

Typical (average) chromatograms are shown. Dilution factor was same for all presented chromatograms. Total areas of peaks were used for calculation of residual anthracene concentration. The initial (0 day of biodegradation) concentration of anthracene in samples was  $2.00 \pm 0.17$  mg/mL.

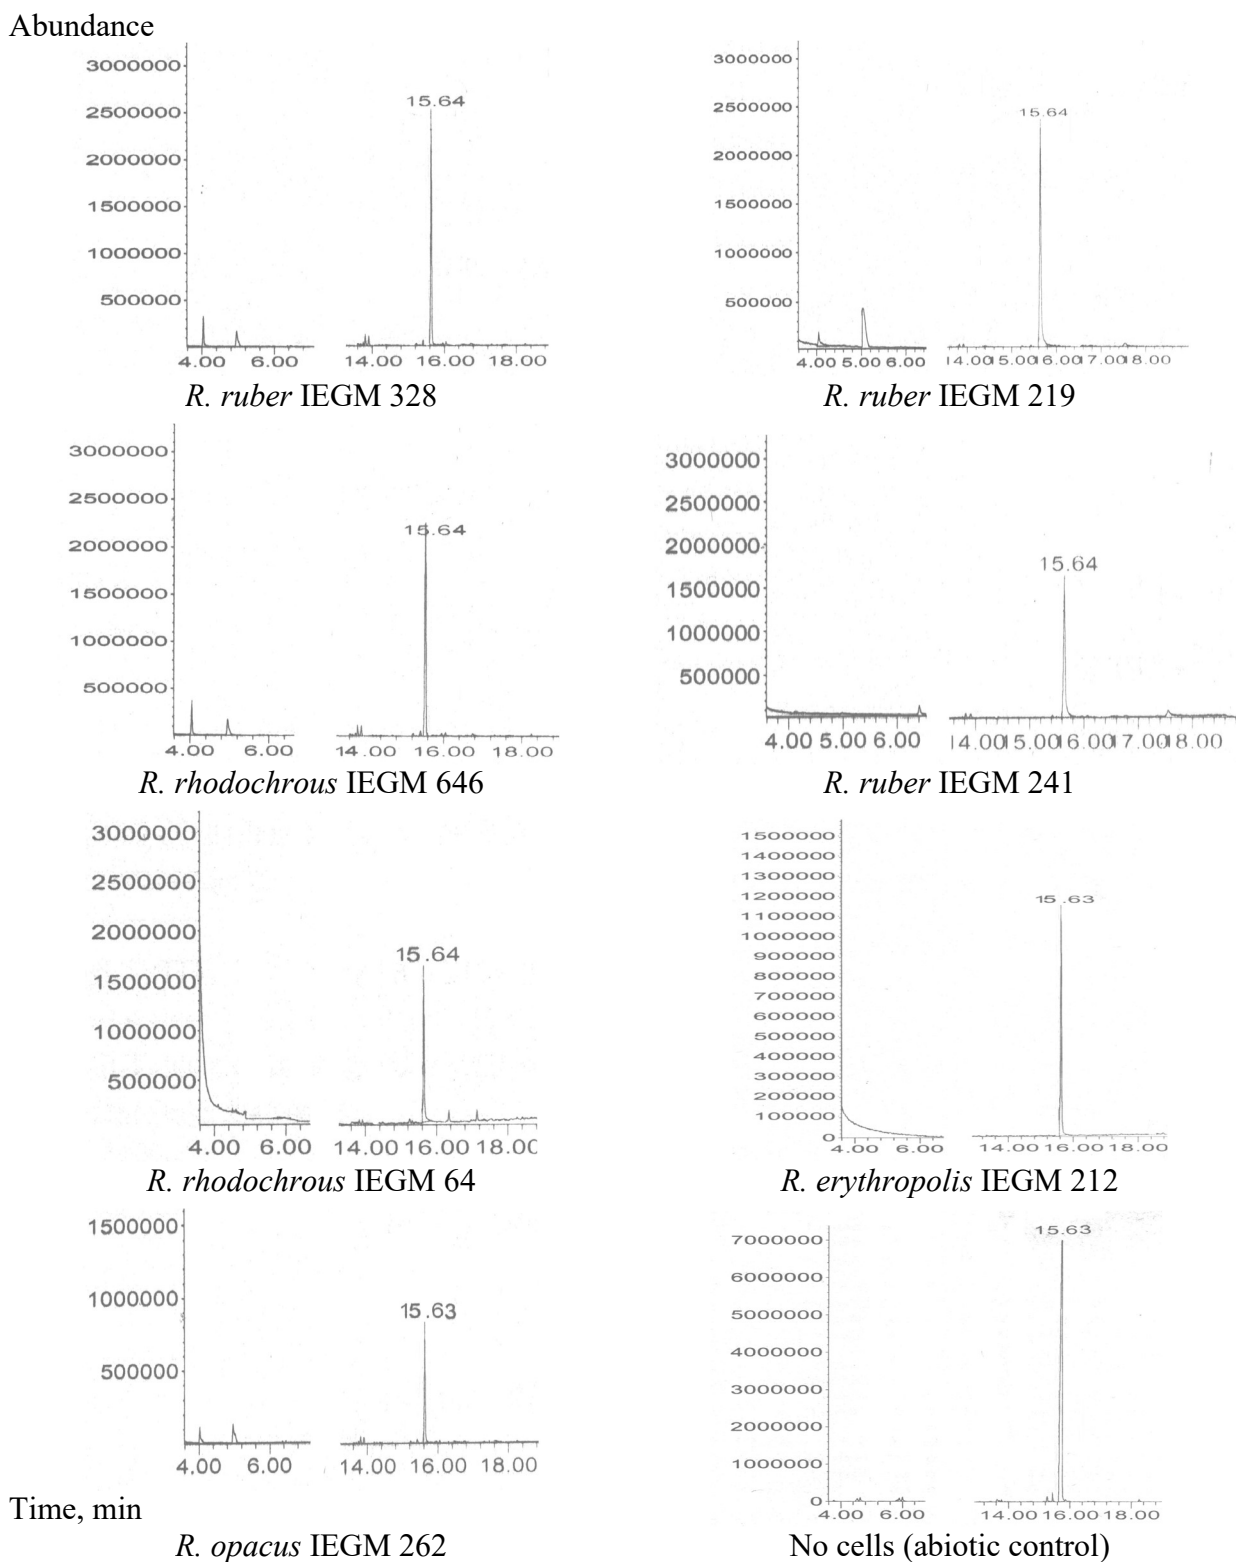

Figure S4 – GC-MS chromatograms of residual anthracene (retention time 15.63–15.66 min) after 9 days of biodegradation by *Rhodococcus* cells

Typical (average) chromatograms are shown. Dilution factor was same for all presented chromatograms. Total areas of peaks were used for calculation of residual anthracene concentration. The initial (0 day of biodegradation) concentration of anthracene in samples was  $2.00 \pm 0.17$  mg/mL.

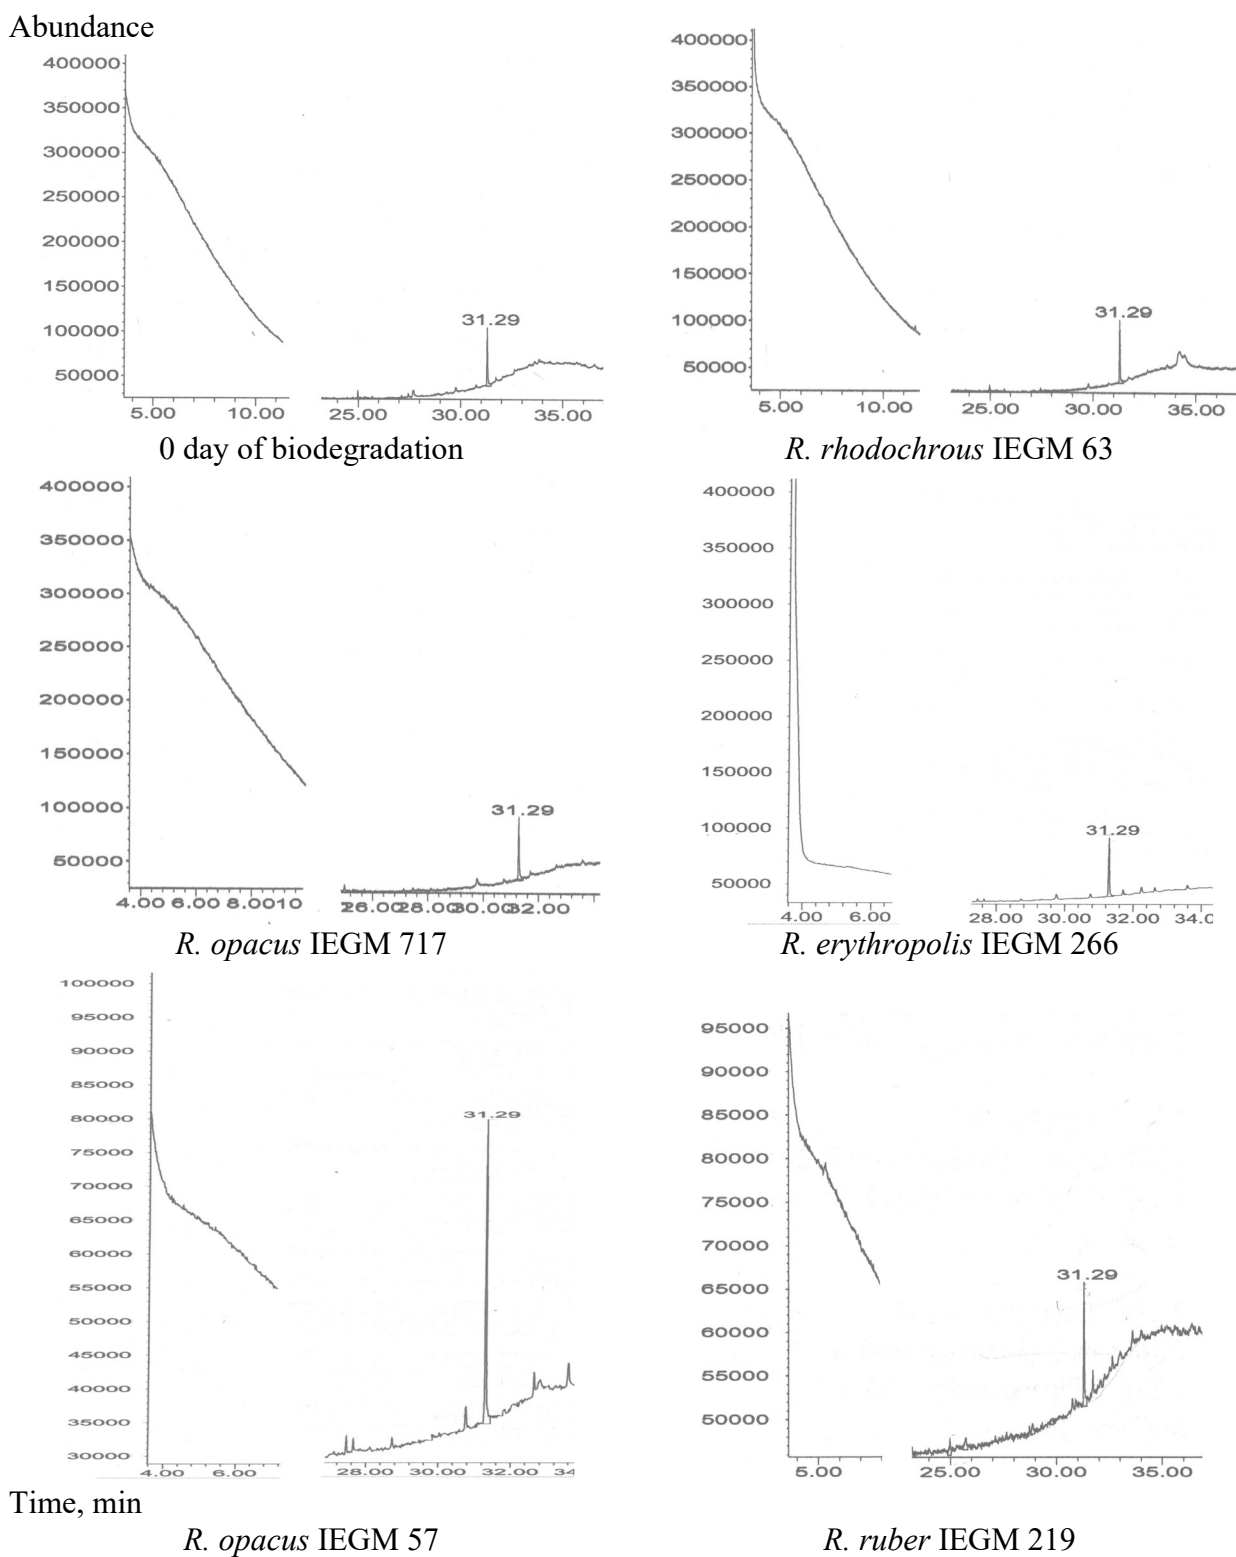

Figure S5 – GC-MS chromatograms of residual *n*-hexacosane (retention time 31.27–31.29 min) after 9 days of biodegradation by *Rhodococcus* cells

Typical (average) chromatograms are shown. Dilution factor was same for all presented chromatograms. Total areas of peaks were used for calculation of residual *n*-hexacosane concentration. The initial (0 day of biodegradation) concentration of *n*-hexacosane in samples was  $2.05 \pm 0.18$  mg/mL.

Abundance

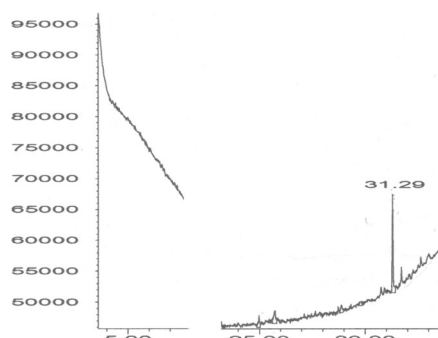

*R. qingshengii* IEGM 267

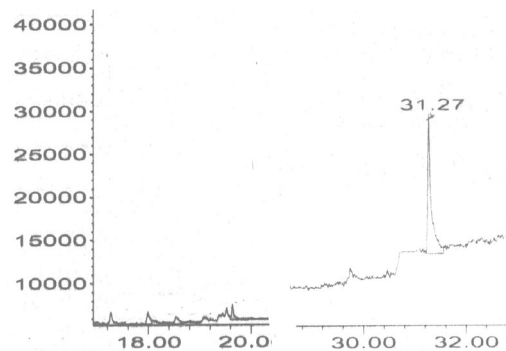

*R. rhodochrous* IEGM 64

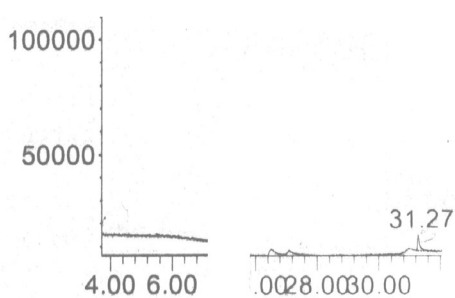

*R. rhodochrous* IEGM 646

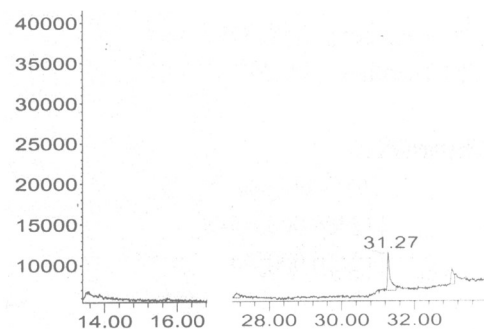

*R. ruber* IEGM 241

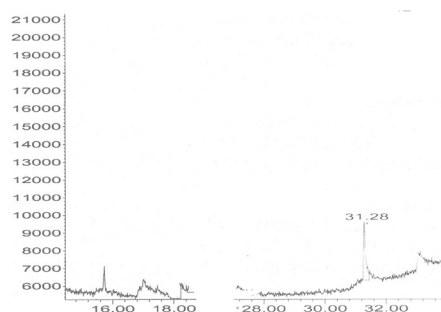

*R. ruber* IEGM 328

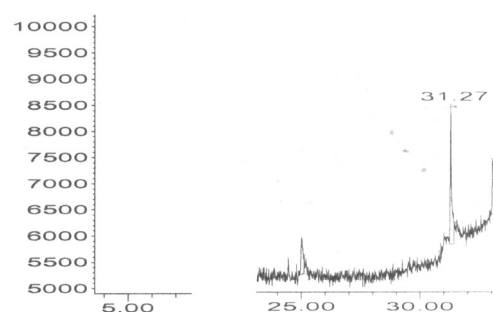

*R. erythropolis* IEGM 212

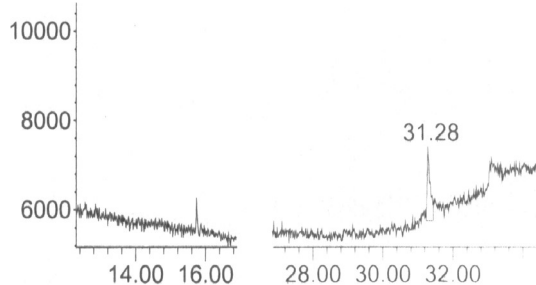

*R. opacus* IEGM 262

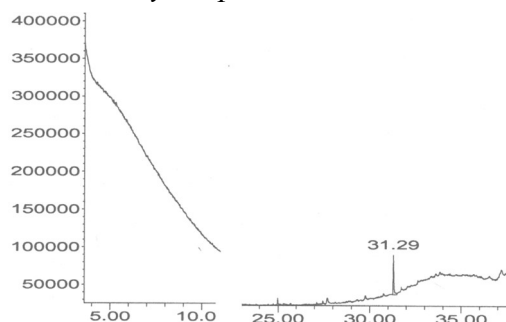

No cells (abiotic control)

Time, min

Figure S5 – GC-MS chromatograms of residual *n*-hexacosane (retention time 31.27–31.29 min) after 9 days of biodegradation by *Rhodococcus* cells

Typical (average) chromatograms are shown. Dilution factor was same for all presented chromatograms. Total areas of peaks were used for calculation of residual *n*-hexacosane concentration. The initial (0 day of biodegradation) concentration of *n*-hexacosane in samples was  $2.05 \pm 0.18$  mg/mL.

Table S3 – Correlations between adhesive activities of *Rhodococcus* strains<sup>1</sup> towards C22–C31 *n*-alkanes and PAHs and physicochemical properties of these hydrocarbons

| Property of a hydrocarbon substrate             | R <sub>Spearman</sub> | <i>p</i> -value |
|-------------------------------------------------|-----------------------|-----------------|
| Water solubility                                | ≤ 0.6                 | ≥ 0.08          |
| <i>logP</i> <sub>O/W</sub>                      | ≤ 0.2                 | ≥ 0.10          |
| Molecular weight                                | ≤ 0.2                 | ≥ 0.10          |
| Length of chain (for C22–C31 <i>n</i> -alkanes) | ≤ 0.6                 | ≥ 0.06          |
| Number of condensed benzene rings (for PAHs)    | ≤ 0.2                 | ≥ 0.08          |

<sup>1</sup>Number of strains studied *n* = 12 (see Table S2).

Table S4 – Medians of adhesion force and elastic modulus on the surface of *Rhodococcus* cells

| Strain                          | Adhesion force ( $F_a$ ), nN | Elastic modulus (E), MPa |
|---------------------------------|------------------------------|--------------------------|
| <i>R. erythropolis</i> IEGM 212 | 7.1                          | 1.4                      |
| <i>R. erythropolis</i> IEGM 266 | 4.4                          | 7.4                      |
| <i>R. opacus</i> IEGM 57        | 1.4                          | 1.8                      |
| <i>R. opacus</i> IEGM 262       | 1.0                          | 27.5                     |
| <i>R. opacus</i> IEGM 717       | 1.4                          | 3.6                      |
| <i>R. qingshengii</i> IEGM 267  | 0.2                          | 0.2                      |
| <i>R. rhodochrous</i> IEGM 63   | 1.8                          | 6.0                      |
| <i>R. rhodochrous</i> IEGM 64   | 3.2                          | 12.0                     |
| <i>R. rhodochrous</i> IEGM 646  | 0.4                          | 0.2                      |
| <i>R. ruber</i> IEGM 219        | 1.1                          | 7.1                      |
| <i>R. ruber</i> IEGM 241        | 1.7                          | 8.1                      |
| <i>R. ruber</i> IEGM 328        | 2.8                          | 31.8                     |

Table S5 – Correlation coefficients between adhesion force, elastic modulus and adhesive activity of *Rhodococcus* bacteria

| Adhesive activity towards | Adhesion force ( $F_a$ ) |             | Elastic modulus (E)   |            |
|---------------------------|--------------------------|-------------|-----------------------|------------|
|                           | $R_{\text{Spearman}}$    | $p$ -value  | $R_{\text{Spearman}}$ | $p$ -value |
| Polystyrene               | 0.2                      | 0.60        | 0.4                   | 0.24       |
| <i>n</i> -Docosane        | 0.2                      | 0.53        | 0.5                   | 0.12       |
| <i>n</i> -Hexacosane      | 0.1                      | 0.77        | 0.5                   | 0.07       |
| <i>n</i> -Octacosane      | 0.1                      | 0.70        | 0.5                   | 0.09       |
| <i>n</i> -Nonacosane      | 0.0                      | 0.98        | 0.6                   | 0.05       |
| <i>n</i> -Hentriacontane  | 0.3                      | 0.34        | 0.4                   | 0.18       |
| Naphthalene               | <b>0.6</b>               | <b>0.03</b> | 0.1                   | 0.86       |
| Anthracene                | 0.0                      | 0.96        | 0.5                   | 0.10       |
| Phenanthrene              | 0.5                      | 0.10        | 0.4                   | 0.26       |
| Benzo[a]pyrene            | 0.2                      | 0.59        | 0.5                   | 0.13       |
| Benzo[a]anthracene        | 0.6                      | 0.05        | 0.3                   | 0.35       |



Table S6 – Correlation coefficients between adhesive activities of *Rhodococcus* strains<sup>1</sup> and physicochemical properties of cells

| Adhesion substrate       | Hydrophobicity of cells |                 |                       |                 | Zeta potential of cells |                 |
|--------------------------|-------------------------|-----------------|-----------------------|-----------------|-------------------------|-----------------|
|                          | MATH                    |                 | SAT                   |                 | R <sub>Spearman</sub>   | <i>p</i> -value |
|                          | R <sub>Spearman</sub>   | <i>p</i> -value | R <sub>Spearman</sub> | <i>p</i> -value |                         |                 |
| <i>n</i> -Docosane       | 0.16                    | ≥ 0.05          | −0.30                 | ≥ 0.05          | 0.40                    | ≥ 0.05          |
| <i>n</i> -Hexacosane     | 0.29                    | ≥ 0.05          | −0.35                 | ≥ 0.05          | 0.15                    | ≥ 0.05          |
| <i>n</i> -Octacosane     | 0.21                    | ≥ 0.05          | −0.35                 | ≥ 0.05          | 0.34                    | ≥ 0.05          |
| <i>n</i> -Nonacosane     | 0.15                    | ≥ 0.05          | −0.32                 | ≥ 0.05          | 0.35                    | ≥ 0.05          |
| <i>n</i> -Hentriacontane | 0.04                    | ≥ 0.05          | −0.28                 | ≥ 0.05          | 0.48                    | ≥ 0.05          |
| Naphthalene              | 0.21                    | ≥ 0.05          | −0.17                 | ≥ 0.05          | −0.19                   | ≥ 0.05          |
| Anthracene               | 0.24                    | ≥ 0.05          | −0.24                 | ≥ 0.05          | 0.07                    | ≥ 0.05          |
| Phenanthrene             | −0.17                   | ≥ 0.05          | −0.13                 | ≥ 0.05          | 0.27                    | ≥ 0.05          |
| Benzo[a]pyrene           | 0.07                    | ≥ 0.05          | −0.36                 | ≥ 0.05          | 0.47                    | ≥ 0.05          |
| Benzo[a]anthracene       | 0.13                    | ≥ 0.05          | −0.24                 | ≥ 0.05          | 0.18                    | ≥ 0.05          |
| Polystyrene              | 0.28                    | ≥ 0.05          | −0.57                 | ≥ 0.05          | 0.15                    | ≥ 0.05          |

<sup>1</sup>Number of the strains studied n = 12 (see Table S2).

Table S7 – Adhesion of *Rhodococcus* cells to MATS substrates, %

| Strain                                                                           | MATS substrate                                 |                                              |                                              |                                              |                                              |                                              |
|----------------------------------------------------------------------------------|------------------------------------------------|----------------------------------------------|----------------------------------------------|----------------------------------------------|----------------------------------------------|----------------------------------------------|
|                                                                                  | <i>n</i> -Hexane                               | <i>n</i> -Decane                             | <i>n</i> -Hexadecane                         | Diethyl ester                                | Ethyl acetate                                | Chloroform                                   |
| <i>R. erythropolis</i> IEGM 212                                                  | 71 ± 9                                         | 68 ± 25                                      | 24 ± 17                                      | 66 ± 18                                      | 5 ± 4                                        | 83 ± 6                                       |
| <i>R. erythropolis</i> IEGM 266                                                  | 38 ± 1                                         | 34 ± 8                                       | 29 ± 4                                       | 63 ± 1                                       | 85 ± 4                                       | 11 ± 8                                       |
| <i>R. opacus</i> IEGM 57                                                         | 89 ± 14                                        | 94 ± 5                                       | 99 ± 1                                       | 33 ± 7                                       | 100 ± 0                                      | 90 ± 9                                       |
| <i>R. opacus</i> IEGM 262                                                        | 0 ± 0                                          | 0 ± 0                                        | 62 ± 12                                      | 75 ± 14                                      | 91 ± 15                                      | 65 ± 7                                       |
| <i>R. opacus</i> IEGM 717                                                        | 39 ± 13                                        | 39 ± 13                                      | 32 ± 13                                      | 77 ± 10                                      | 36 ± 6                                       | 55 ± 18                                      |
| <i>R. qingshengii</i> IEGM 267                                                   | 54 ± 4                                         | 69 ± 8                                       | 55 ± 6                                       | 96 ± 1                                       | 78 ± 18                                      | 82 ± 2                                       |
| <i>R. rhodochrous</i> IEGM 63                                                    | 33 ± 4                                         | 71 ± 4                                       | 25 ± 14                                      | 79 ± 7                                       | 0 ± 0                                        | 77 ± 9                                       |
| <i>R. rhodochrous</i> IEGM 64                                                    | 89 ± 5                                         | 85 ± 17                                      | 87 ± 3                                       | 93 ± 6                                       | 99 ± 2                                       | 87 ± 1                                       |
| <i>R. rhodochrous</i> IEGM 646                                                   | 32 ± 3                                         | 42 ± 9                                       | 38 ± 1                                       | 71 ± 11                                      | 14 ± 3                                       | 61 ± 4                                       |
| <i>R. ruber</i> IEGM 219                                                         | 69 ± 6                                         | 73 ± 23                                      | 75 ± 2                                       | 84 ± 12                                      | 40 ± 20                                      | 77 ± 1                                       |
| <i>R. ruber</i> IEGM 241                                                         | 49 ± 23                                        | 59 ± 15                                      | 60 ± 1                                       | 79 ± 23                                      | 86 ± 13                                      | 72 ± 4                                       |
| <i>R. ruber</i> IEGM 328                                                         | 36 ± 2                                         | 45 ± 2                                       | 37 ± 2                                       | 69 ± 3                                       | 61 ± 13                                      | 42 ± 4                                       |
| Correlations with adhesive activities towards solid hydrocarbons and polystyrene | $R_{\text{Spearman}} \leq 0.56^1, p \geq 0.05$ | $R_{\text{Spearman}} \leq 0.54, p \geq 0.05$ | $R_{\text{Spearman}} \leq 0.36, p \geq 0.05$ | $R_{\text{Spearman}} \leq 0.39, p \geq 0.05$ | $R_{\text{Spearman}} \leq 0.36, p \geq 0.05$ | $R_{\text{Spearman}} \leq 0.41, p \geq 0.05$ |

Number of the strains studied  $n = 12$  (see Table S2). <sup>1</sup>Absolute values for the correlation coefficients are shown.
